# Supplementary material for: Anthracene coupled adenine for the selective sensing of copper ions
Source: publisher site journal article supplement (doi:10.3762/bjoc.6.44), 2010-05-05
Supplement: Additional file 1 [file 1860-5397-6-44-S1.pdf]

# Supporting Information

for

## **Anthracene coupled adenine for the selective sensing of copper ions**

Kumaresh Ghosh<sup>\*</sup> and Tanushree Sen

Address: Department of Chemistry, University of Kalyani, Kalyani-741235, India.

Email: Kumaresh Ghosh - ghosh\_k2003@yahoo.co.in

\* Corresponding author

Stoichiometry curves for **1** and **2** with  $\text{Cu}^{2+}$  ions.

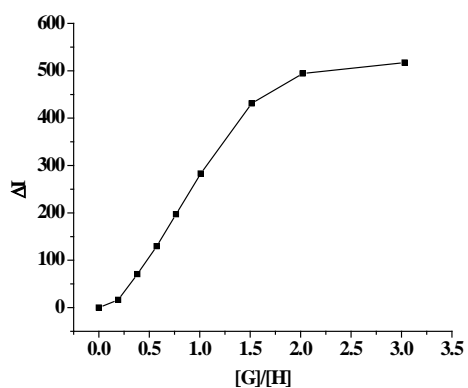

**Figure S1:** Stoichiometry plot for receptor **1** upon addition of  $\text{Cu}^{2+}$  ion from fluorescence.

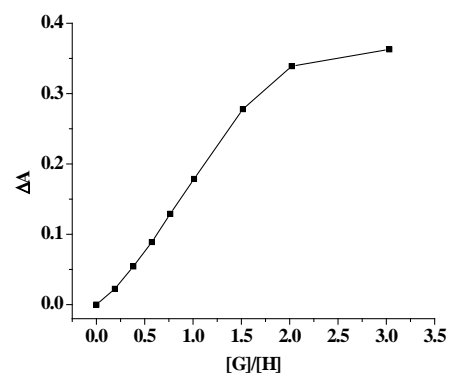

**Figure S2:** Stoichiometry plot for receptor **1** upon addition of  $\text{Cu}^{2+}$  ion from UV.

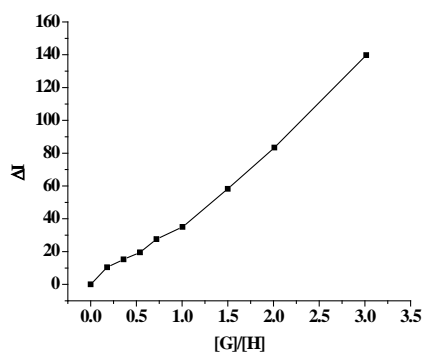

**Figure S3:** Stoichiometry plot for receptor **2** upon addition of  $\text{Cu}^{2+}$  ion from fluorescence.
